# Supplementary material
Source: PubMed Central journal article supplement (PMC8417932)
Supplement: nxab156_supplemental_file.pdf [file nxab156_supplemental_file.pdf]

**Supplementary Figure 1: Flow Chart for Newborns Born to Women Carrying Multiple Fetuses and Teens Included in the**

**Current Study**

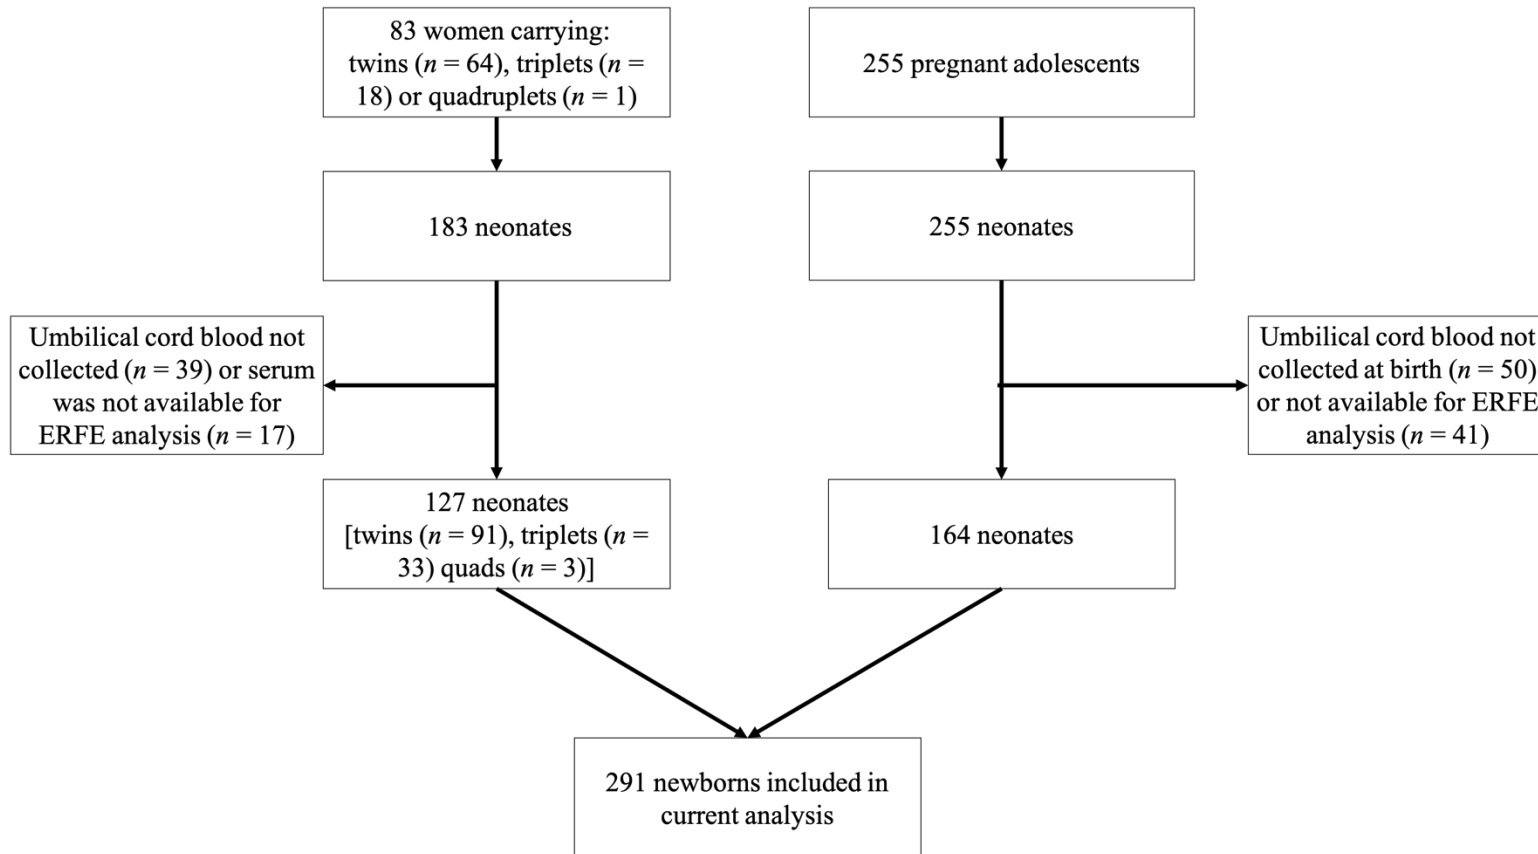

Flow of participants from recruitment to inclusion from each cohort into the current study.
